# Supplementary material for: Ultrasound-Assisted Extraction and Characterization of Polyphenols from Apple Pomace, Functional Ingredients for Beef Burger Fortification
Source: MDPI journal article supplement (doi:10.3390/molecules27061933), 2022-03-16
Supplement: s1 [file s1]

## Supplementary Material

# Ultrasound-Assisted Extraction and Characterization of Apple Pomace, Functional Ingredient for Beef Burger Fortification

Luna Pollini <sup>1,†</sup>, Francesca Blasi <sup>1,†</sup>, Federica Ianni <sup>1</sup>, Luca Grispoldi <sup>2,\*</sup>, Simone Moretti <sup>3</sup>, Alessandra Di Veroli <sup>3</sup>, Lina Cossignani <sup>1,4,\*</sup> and Beniamino Terzo Cenci-Coga <sup>2</sup>

<sup>1</sup> Department of Pharmaceutical Sciences, University of Perugia, 06126 Perugia, Italy;

luna.pollini@studenti.unipg.it (L.P.); francesca.blasi@unipg.it (F.B.); federica.ianni@unipg.it (F.I.)

<sup>2</sup> Department of Veterinary Medicine, University of Perugia, 06126 Perugia, Italy; beniamino.cencigoga@unipg.it

<sup>3</sup> Department of Chemistry, Biology and Biotechnology, University of Perugia, 06123 Perugia, Italy; simone.moretti@molhorizon.it (S.M.); alessandra.diveroli@unipg.it (A.D.V.)

<sup>4</sup> Center for Perinatal and Reproductive Medicine, University of Perugia, Santa Maria della Misericordia University Hospital, 06132 Perugia, Italy

\* Correspondence: lina.cossignani@unipg.it (L.C.); luca.grispoldi@unipg.it (L.G.); Tel.: +39-075-585-7959 (L.C.); +39-075-585-7935 (L.G.)

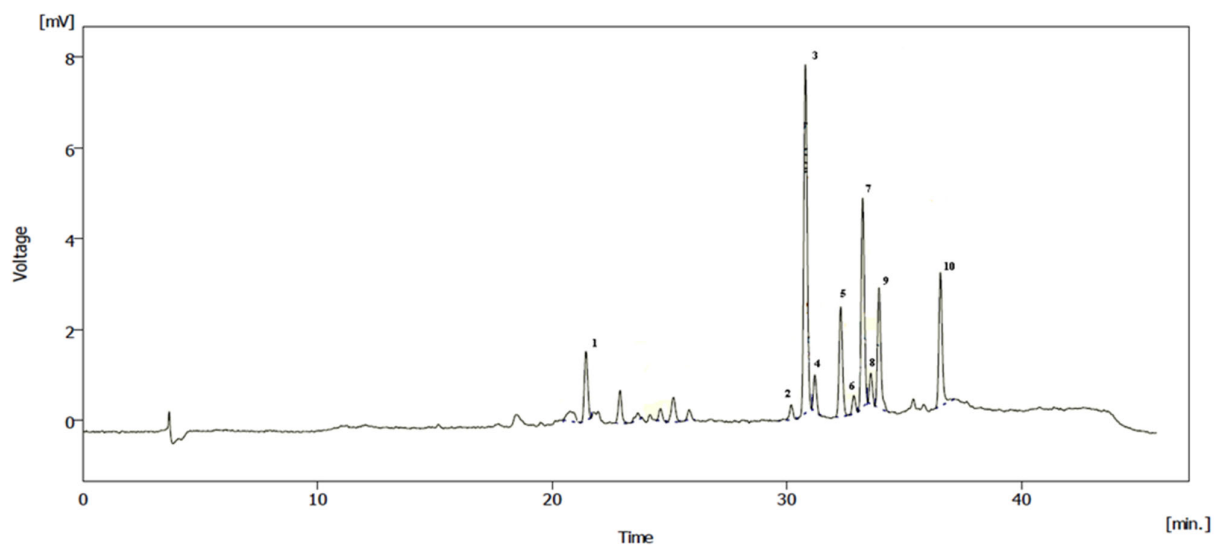

**Figure S1.** HPLC-UV chromatographic profile of UAE extract, from double extraction of freeze-dried apple pomace (FD2). <sup>1</sup> chlorogenic acid; <sup>2</sup> rutin; <sup>3</sup> quercetin-3-O-galattoside; <sup>4</sup> quercetin-3-O-glucoside; <sup>5</sup> quercetin-3-O-xyloside; <sup>6</sup> quercetin-3-O-arabinopiranoside; <sup>7</sup> quercetin-3-O-arabinofuranoside; <sup>8</sup> quercetin-O-pentoside; <sup>9</sup> quercetin-3-O-rhamnoside; <sup>10</sup> phloridzin.

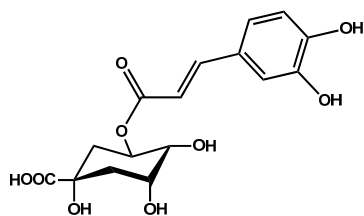

Chlorogenic acid

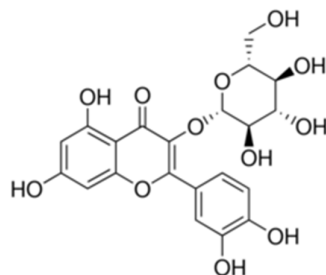

Quercetin-3-*O*-galactoside

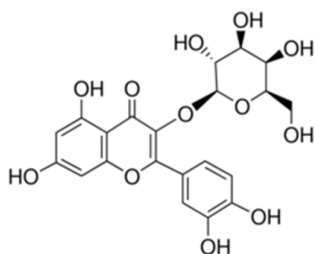

Quercetin-3-*O*-glucoside

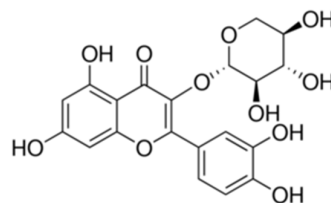

Quercetin-3-*O*-xyloside

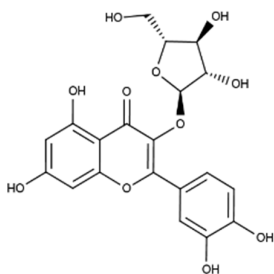

Quercetin-3-*O*-arabinofuranoside

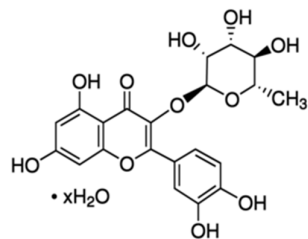

Quercetin-3-*O*-rhamnoside

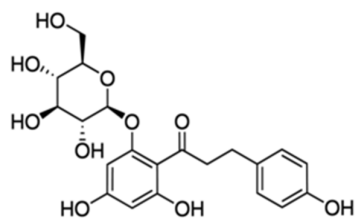

Phloridzin

**Figure S2.** Chemical structures of the main quantified compounds.

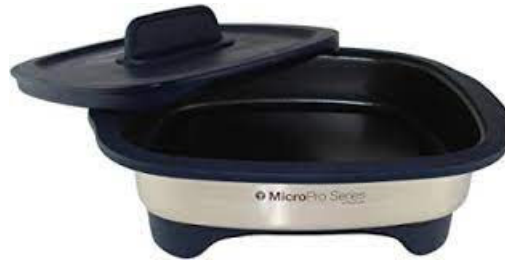

(a)

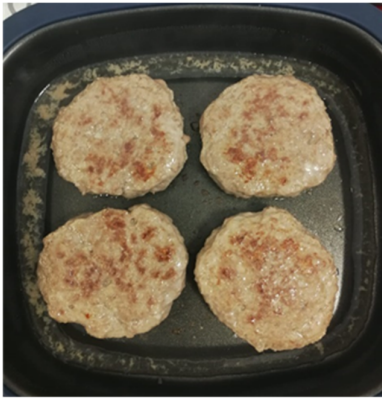

(b)

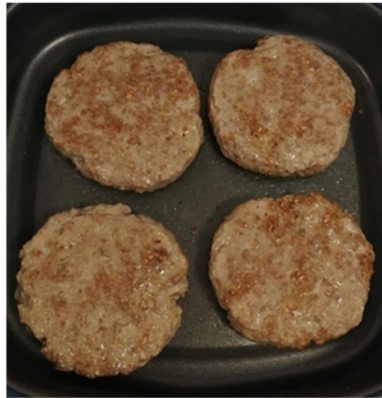

(c)

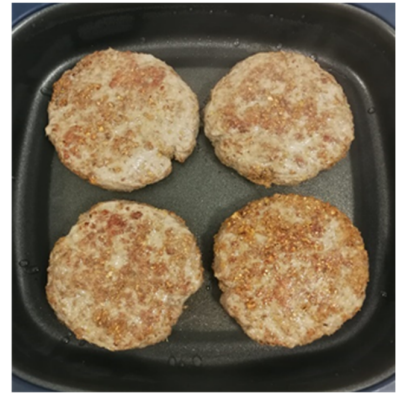

(d)

**Figure S3.** Cooking equipment (a) and cooked beef burgers with different apple pomace addition: 0 % (b), 4 % (c), and 8 % (d).

**Table S1.** Calibration curve, R<sup>2</sup>, and range of linearity of spectrophotometric *in vitro* assays.

|             | <b>Linearity range</b> | <b>Calibration curve</b> | <b>R<sup>2</sup></b> |
|-------------|------------------------|--------------------------|----------------------|
| <b>TPC</b>  | 6.25–100 µg/mL         | $y = 0.0121x - 0.0262$   | 0.9994               |
| <b>ABTS</b> | 0.01–0.3 µg/mL         | $y = -1.5097x + 0.6673$  | 0.9992               |
| <b>DPPH</b> | 0.5–250.0 µg/mL        | $y = 1.4259x + 0.6499$   | 0.9997               |
| <b>FRAP</b> | 0.5–10 µg/mL           | $y = 96.305x + 0.0368$   | 0.9995               |
